# Supplementary material for: Re-Operative Laparoscopic Colorectal Surgery: A Systematic Review
Source: MDPI journal article supplement (doi:10.3390/jcm10071447), 2021-04-01
Supplement: s1 [file s1]

## Supplementary Material

### Figure S1. PRISMA Flow Diagram of Study

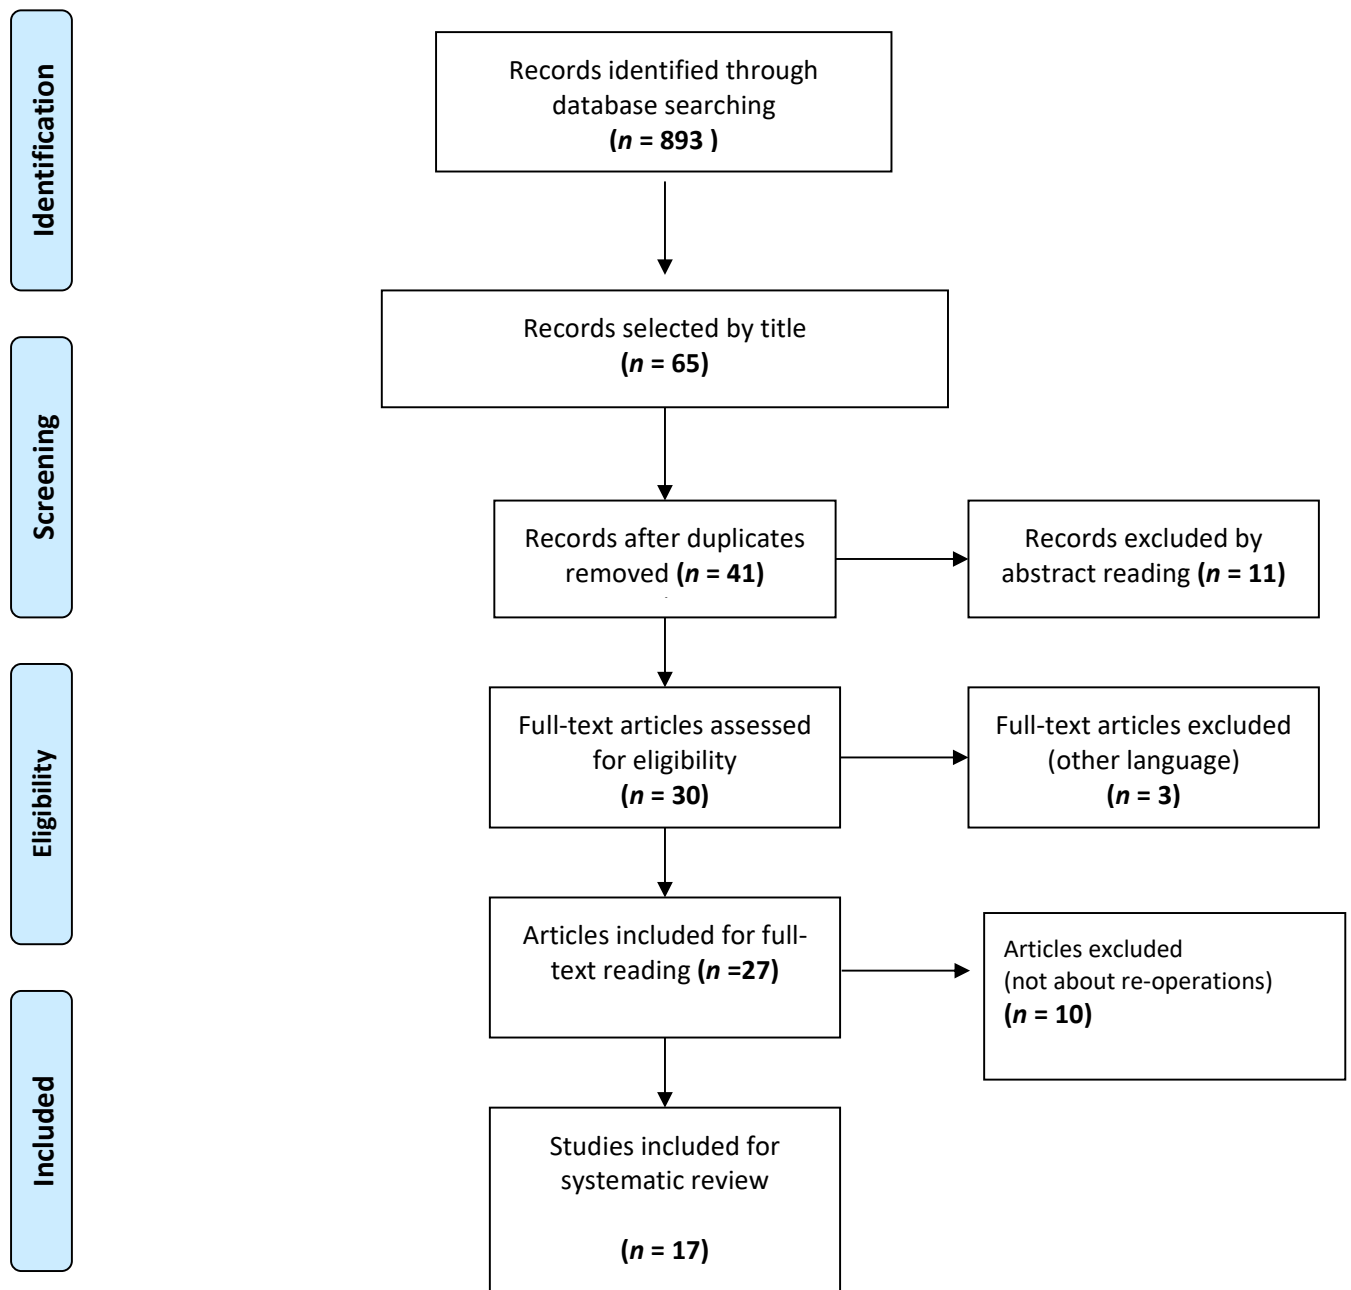

From: Moher, D.; Liberati, A.; Tetzlaff, J.; Altman, D.G.; The PRISMA Group. Preferred Reporting Items for Systematic Reviews and Meta-Analyses: The PRISMA Statement. *PLoS Med.* **2009**, 6, e1000097, doi:10.1371/journal.pmed1000097.

For more information, visit [www.prisma-statement.org](http://www.prisma-statement.org).
